# Supplementary figures and images for: The Role of Receptor Tyrosine Kinases in Lassa Virus Cell Entry
Source: MDPI journal article supplement (doi:10.3390/v12080857), 2020-08-06

**A549**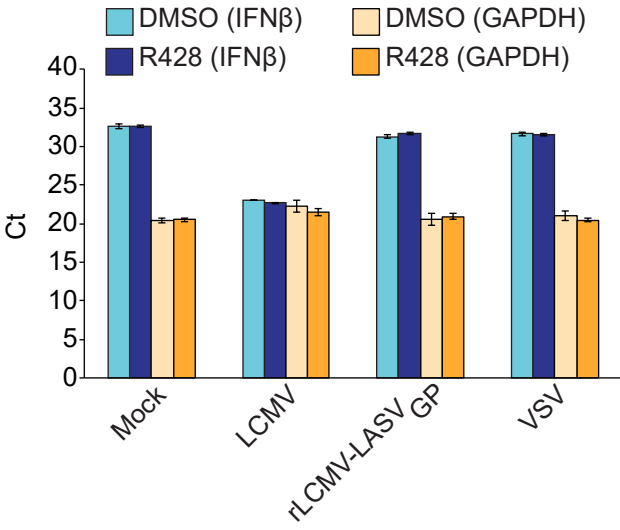**HT-1080**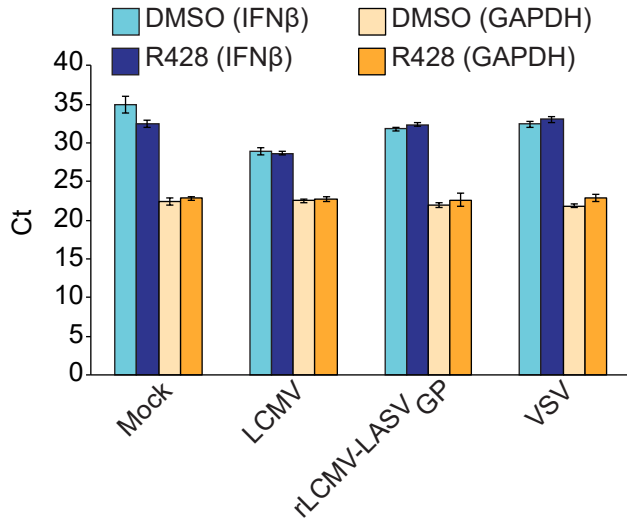

Supplement: s1 [file s1]

Dextran

NP

Merged + DAPI

Uninfected

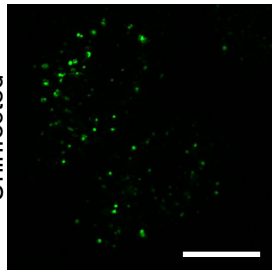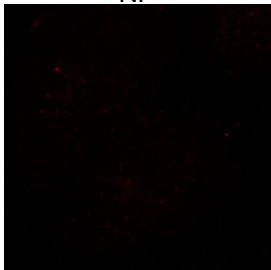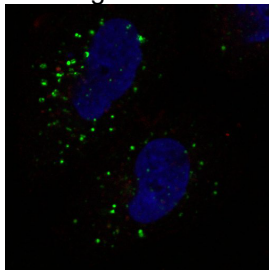

Infected

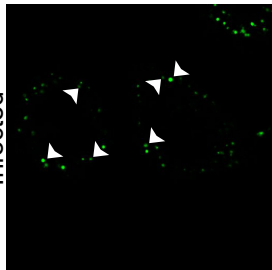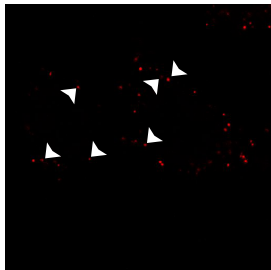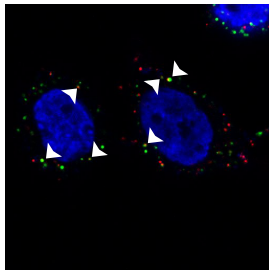

Infected

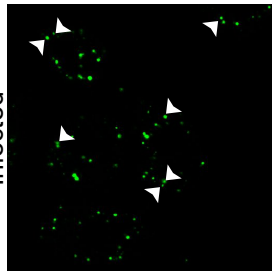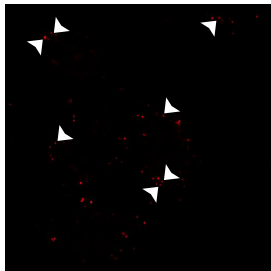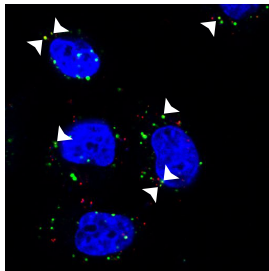

Supplement: s1 [file s1]

**A**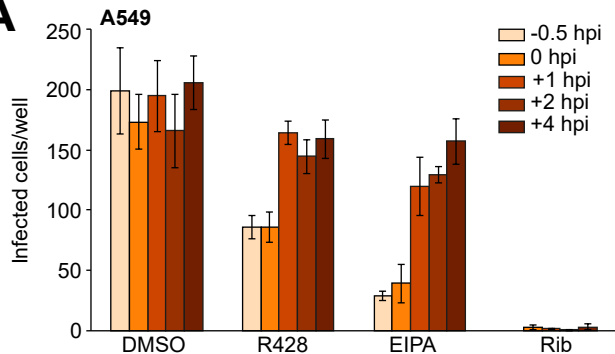**B**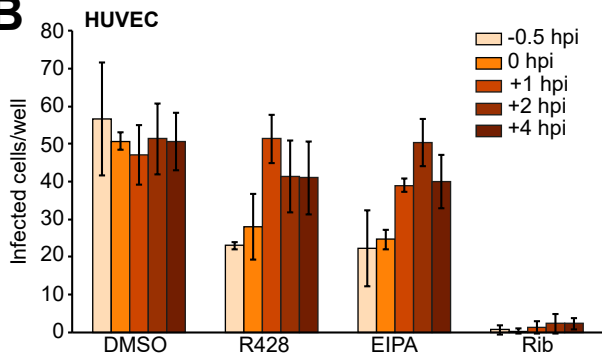**C**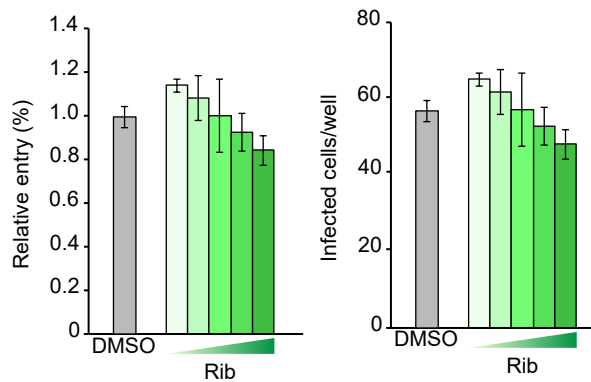**D**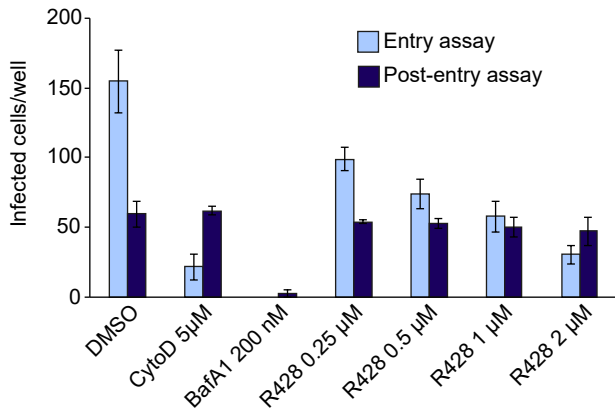

Supplement: s1 [file s1]

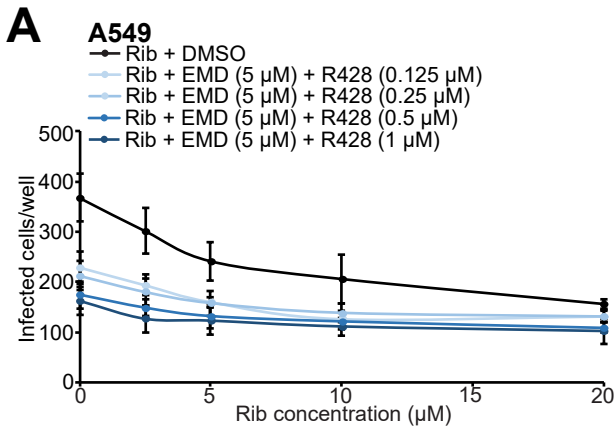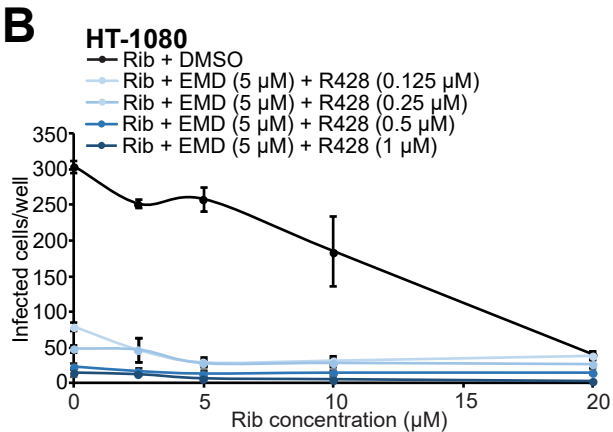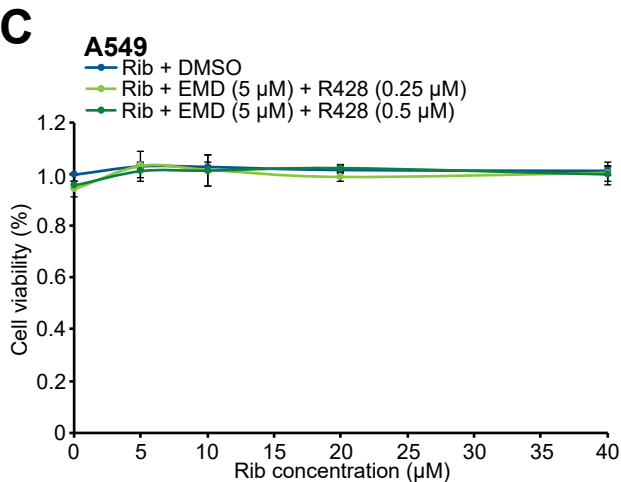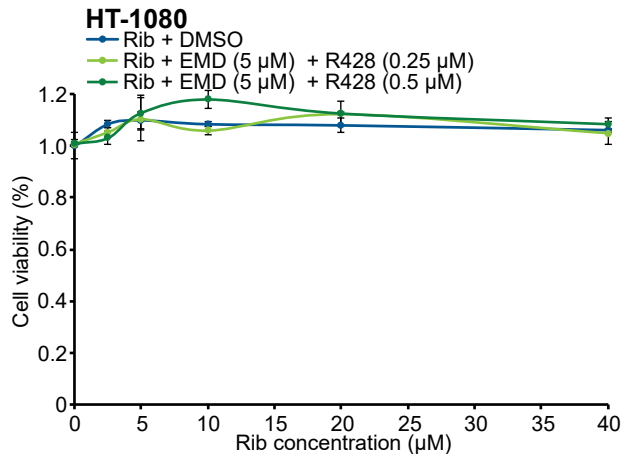

Supplement: s1 [file s1]

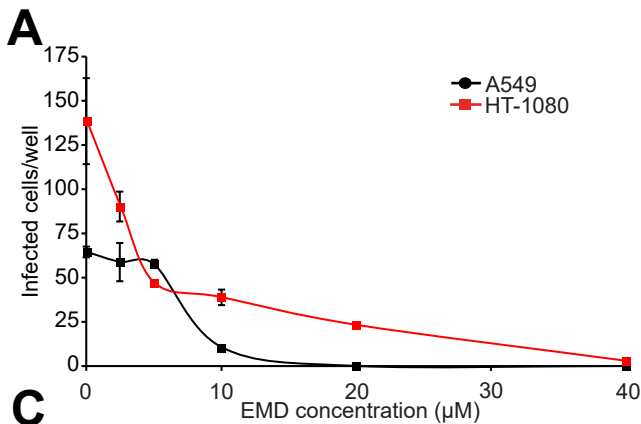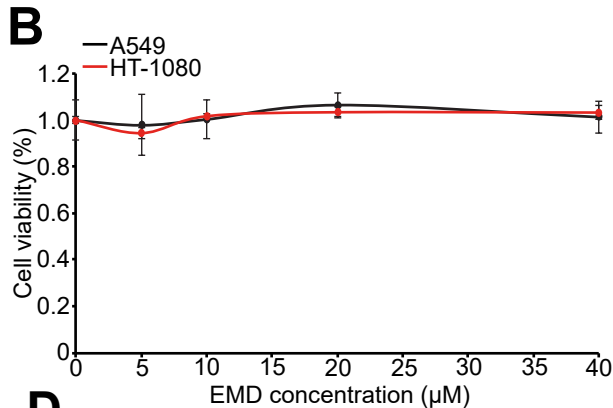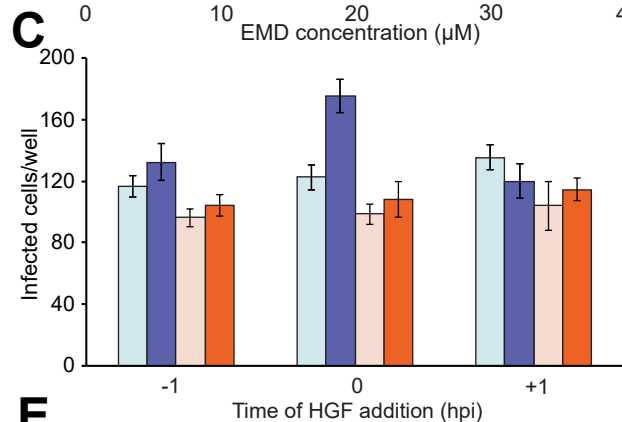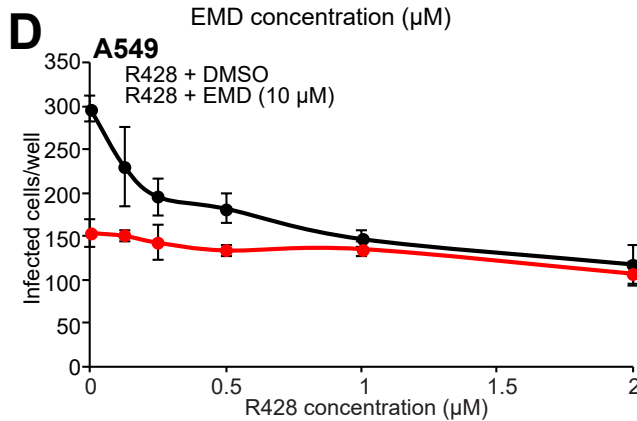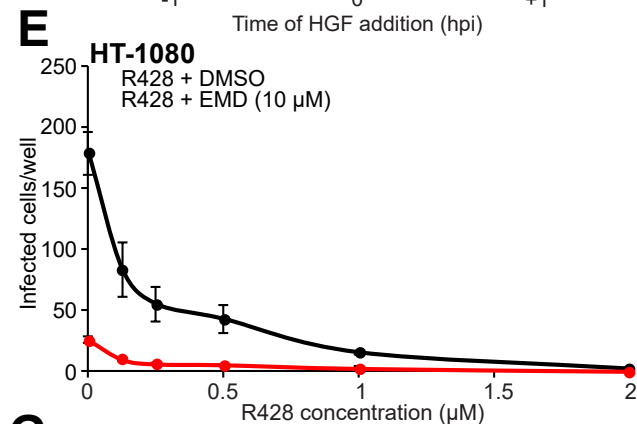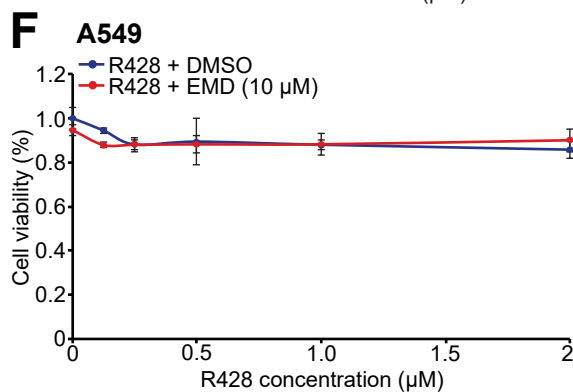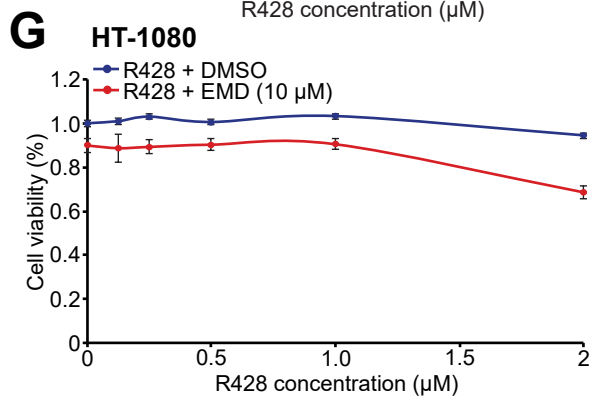

Supplement: s1 [file s1]

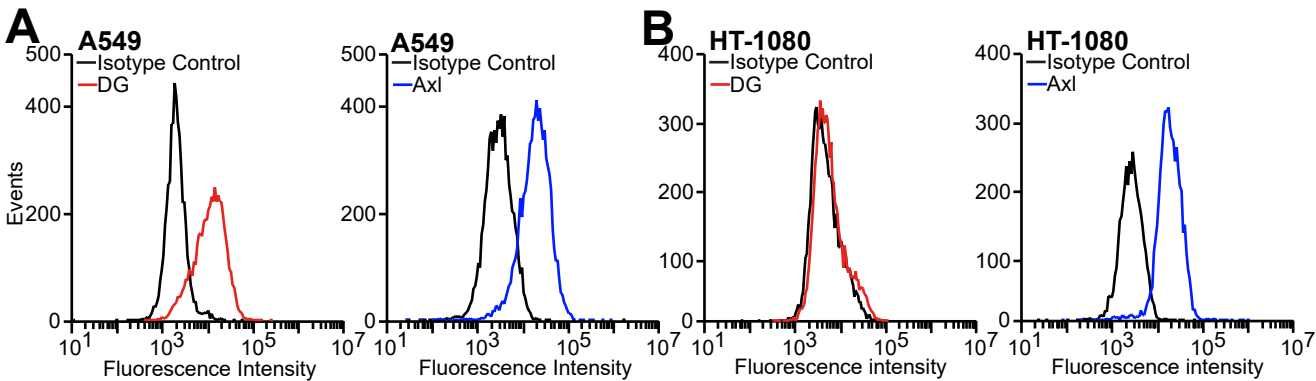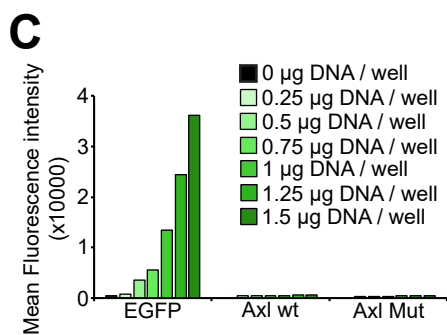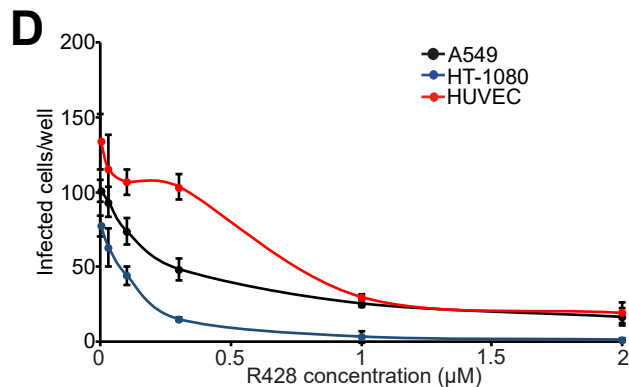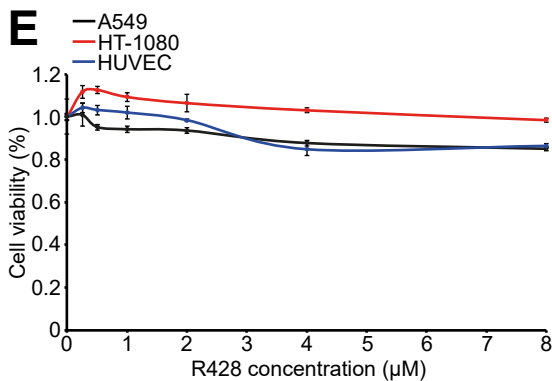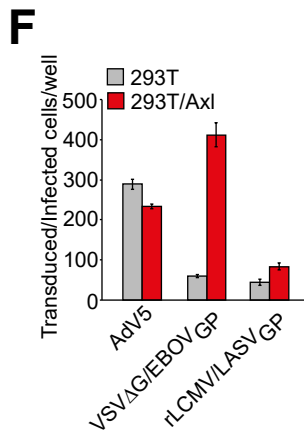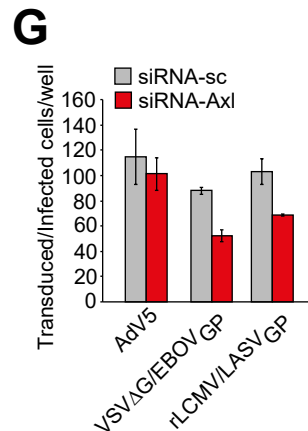

Supplement: s1 [file s1]
